# Supplementary material for: Prenatal Cannabis Use and Maternal Pregnancy Outcomes
Source: PubMed Central journal article supplement (PMC11264060; doi:10.1001/jamainternmed.2024.3270), 2024-07-22
Supplement: jamainternmed-e243270-s002.pdf [file jamainternmed-e243270-s002.pdf]

## Data Sharing Statement

Young-Wolff. Prenatal Cannabis Use and Maternal Pregnancy Outcomes. *JAMA Intern Med.*  
Published July 22, 2024. doi:10.1001/jamainternmed.2024.3270

### Data

**Data available:** No
